# Supplementary material for: An improved method for detecting and delineating genomic regions with altered gene expression in cancer
Source: PubMed Central journal article supplement (PMC2395254; doi:10.1186/gb-2008-9-1-r13), 2008-01-21
Supplement: gb-2008-9-1-r13-S1.pdf [file gb-2008-9-1-r13-S1.pdf]

## **Additional file 1**

This document contains the full set of receiver operating characteristics (ROC) curves from the simulation study. The generation and interpretation of these results is described in the main paper.

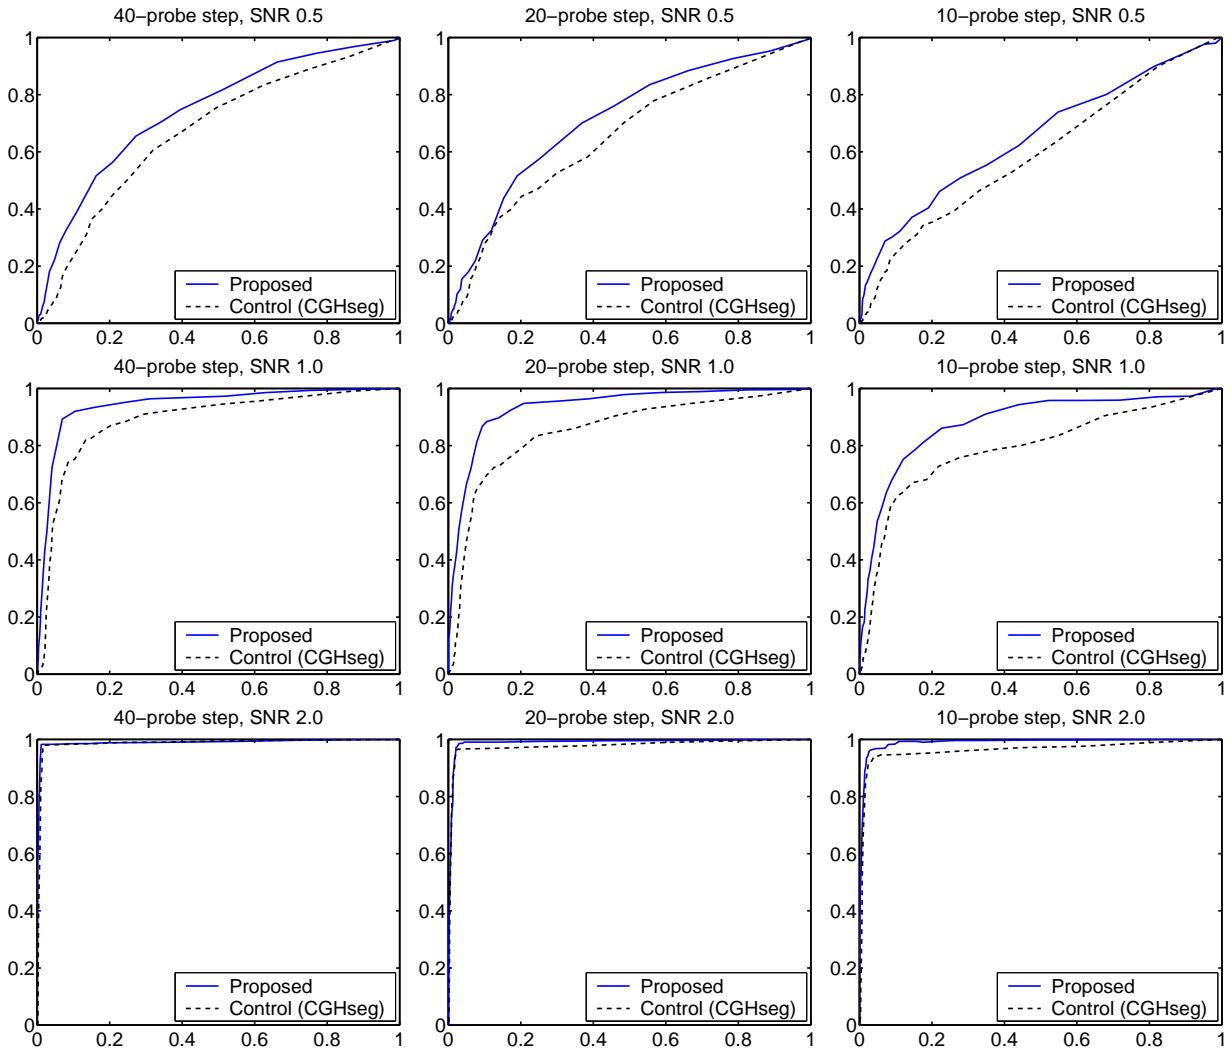

Receiver operating characteristics (ROC),  $\pi = 0.0$

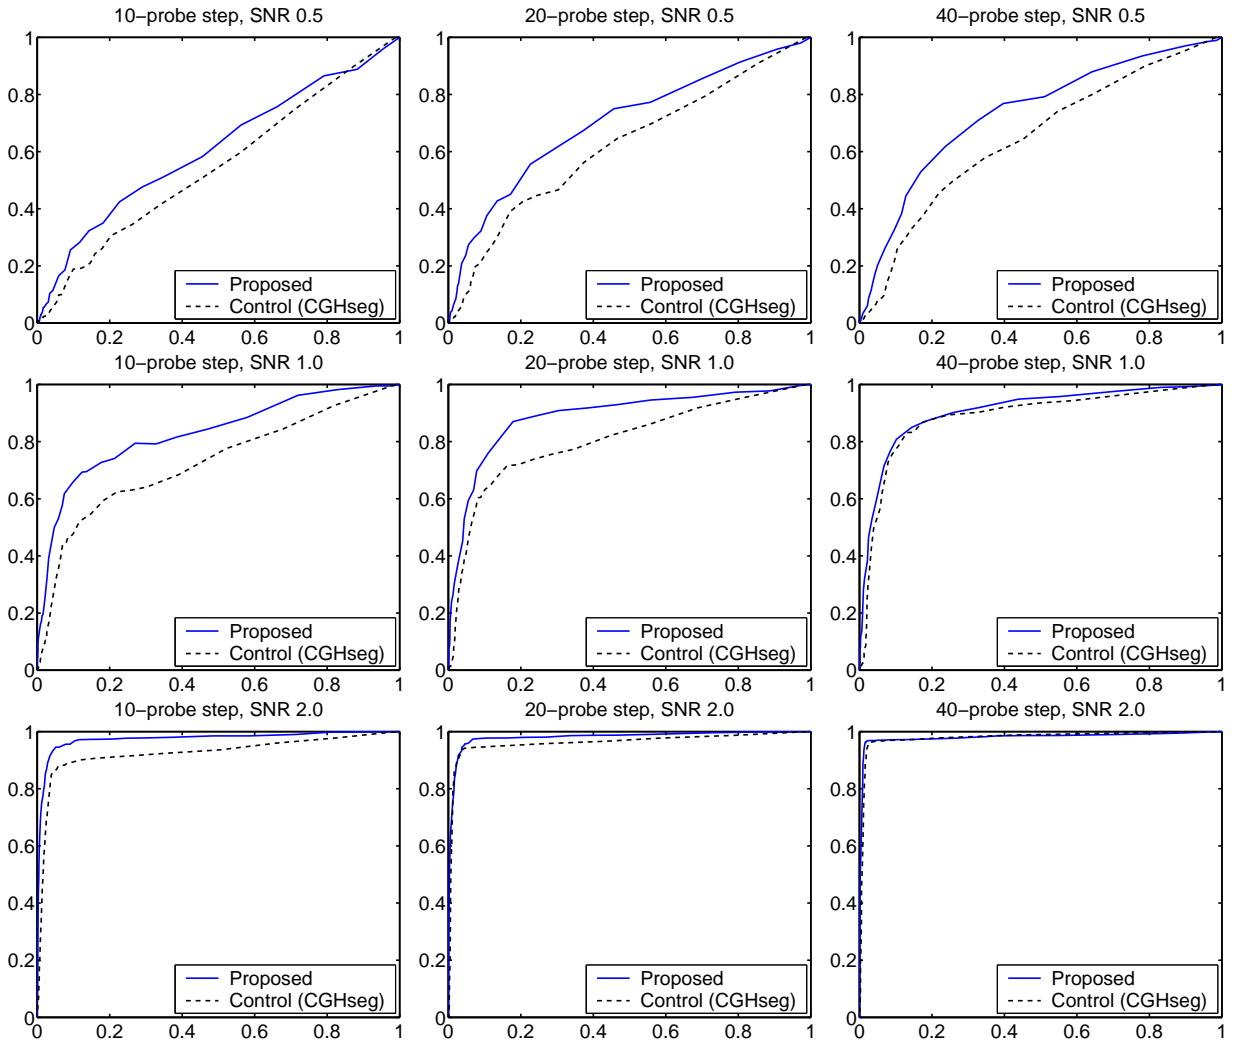

Receiver operating characteristics (ROC),  $\pi = 0.1$

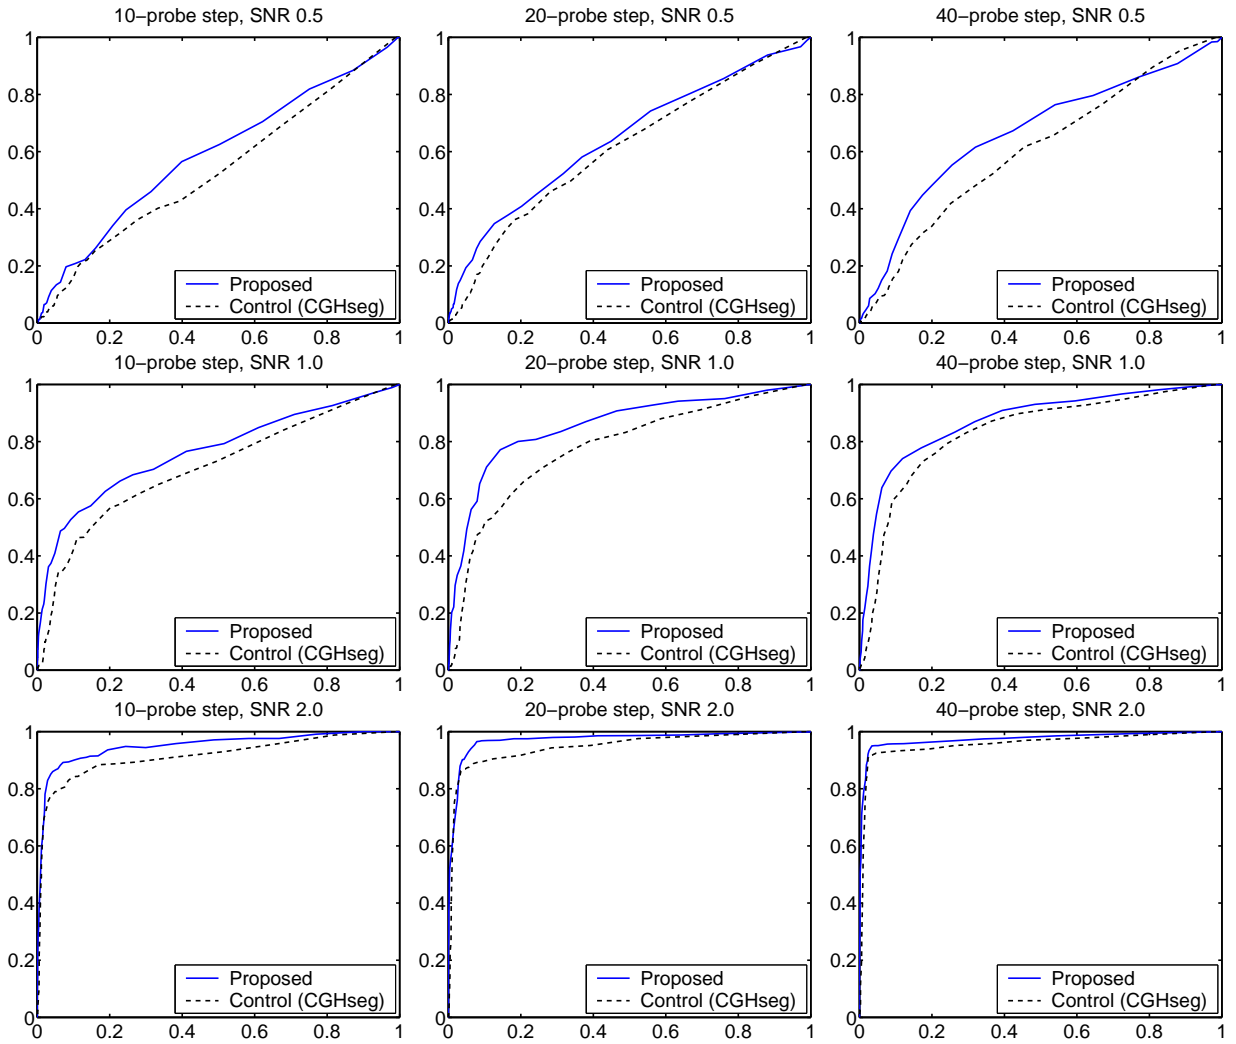

Receiver operating characteristics (ROC),  $\pi = 0.2$

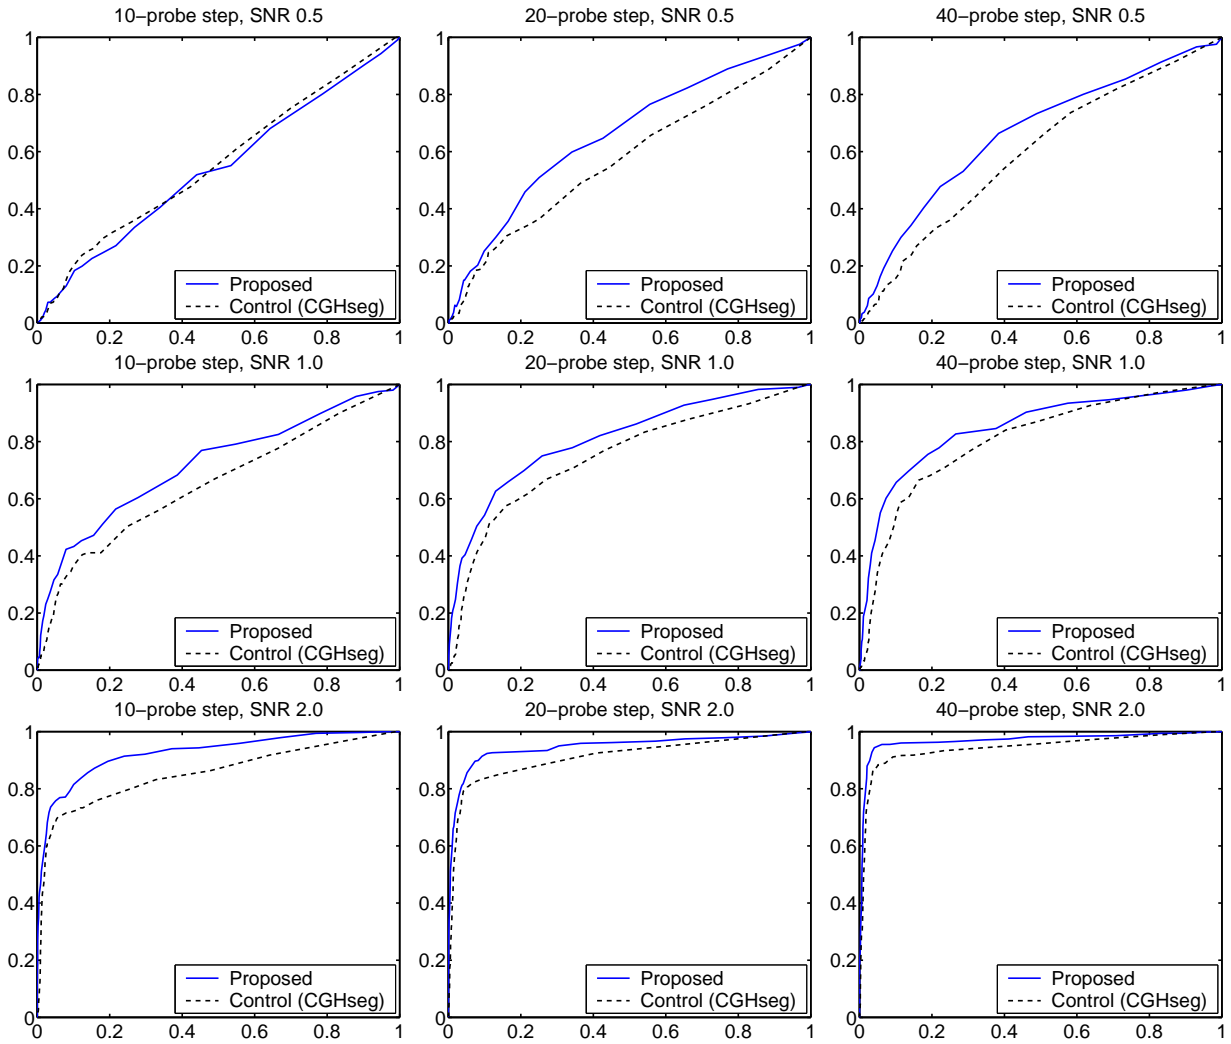

Receiver operating characteristics (ROC),  $\pi = 0.3$

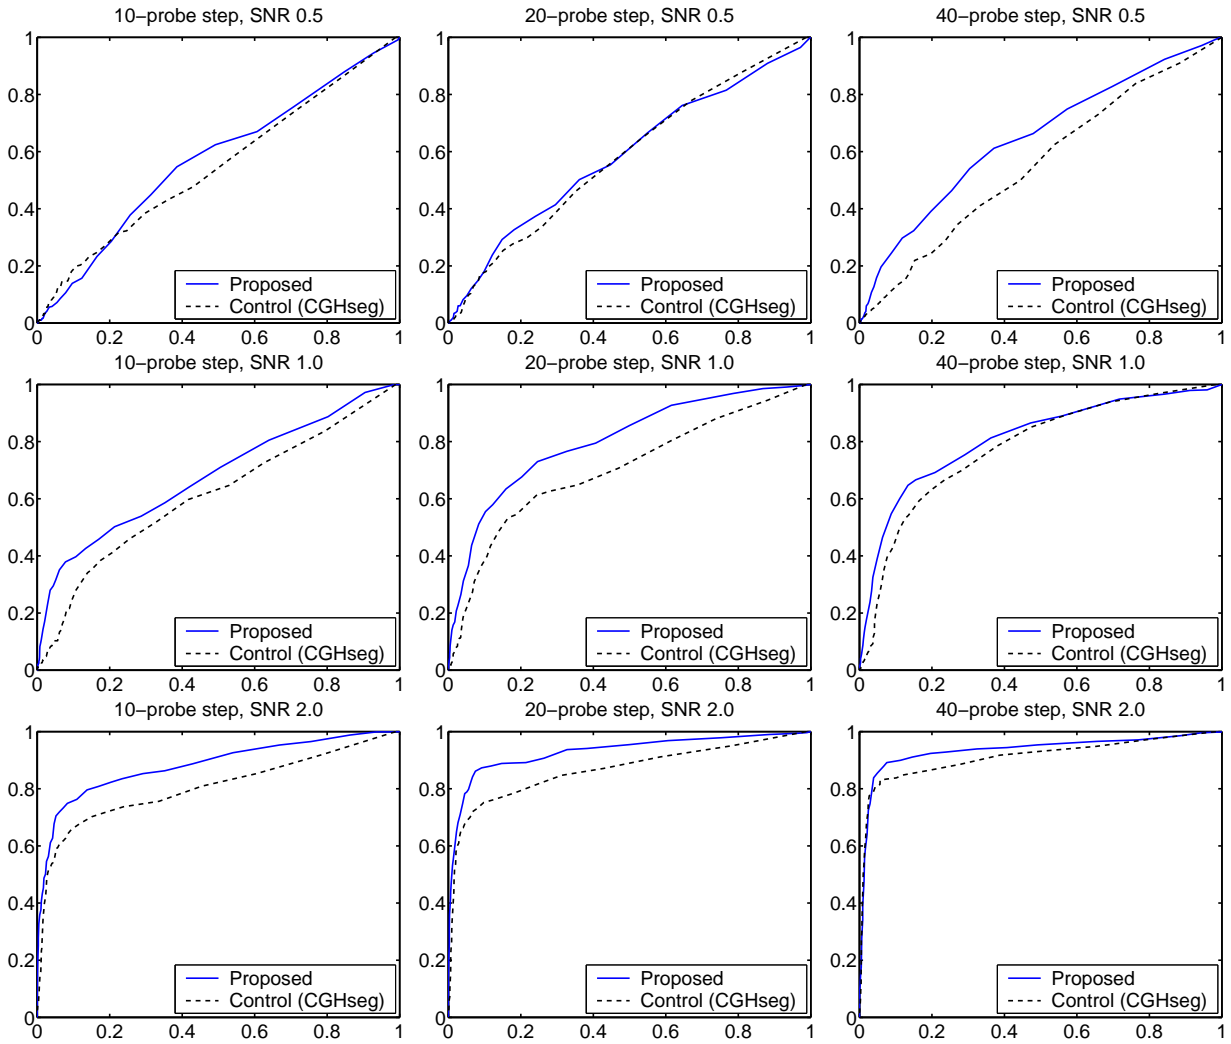

Receiver operating characteristics (ROC),  $\pi = 0.4$

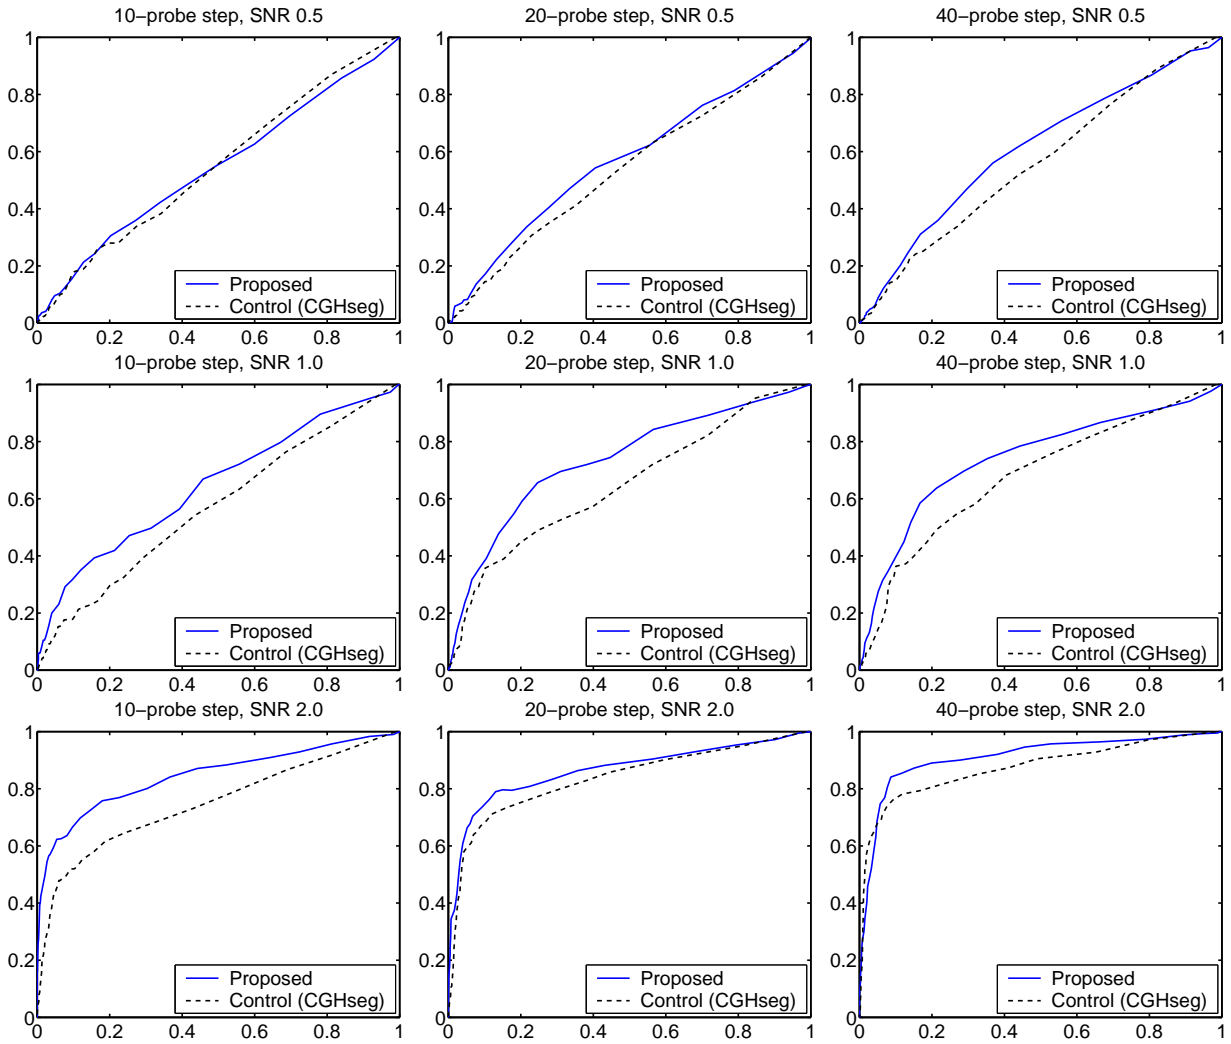

Receiver operating characteristics (ROC),  $\pi = 0.5$
