# Supplementary material for: An improved method for detecting and delineating genomic regions with altered gene expression in cancer
Source: PubMed Central journal article supplement (PMC2395254; doi:10.1186/gb-2008-9-1-r13), 2008-01-21
Supplement: gb-2008-9-1-r13-S2.pdf [file gb-2008-9-1-r13-S2.pdf]

## **Additional file 2**

This document contains the full set of breakpoint distribution plots from the simulation study. The generation and interpretation of these results is described in the main paper.

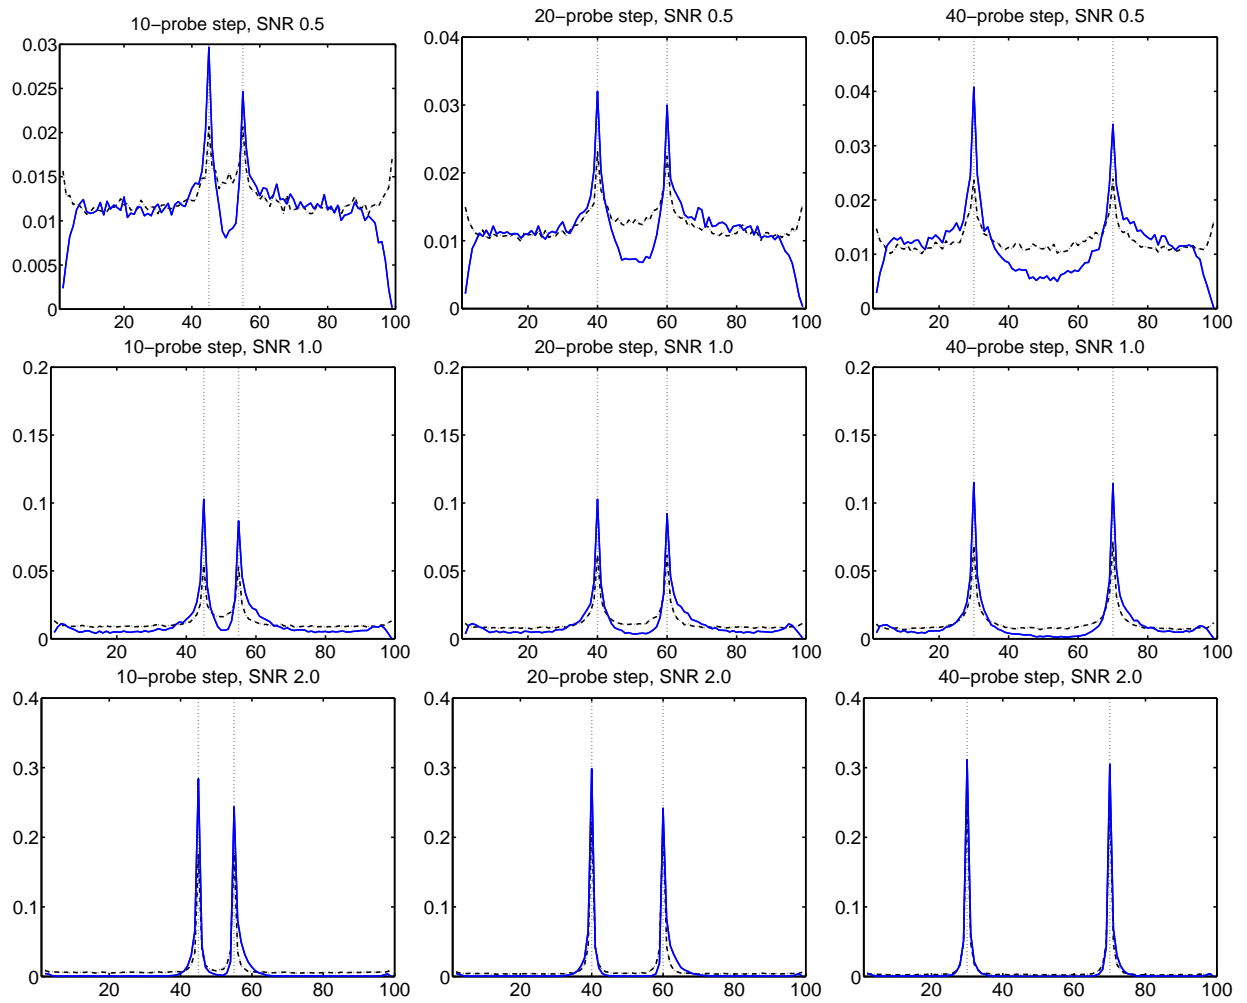

Breakpoint distribution,  $\pi = 0.0$

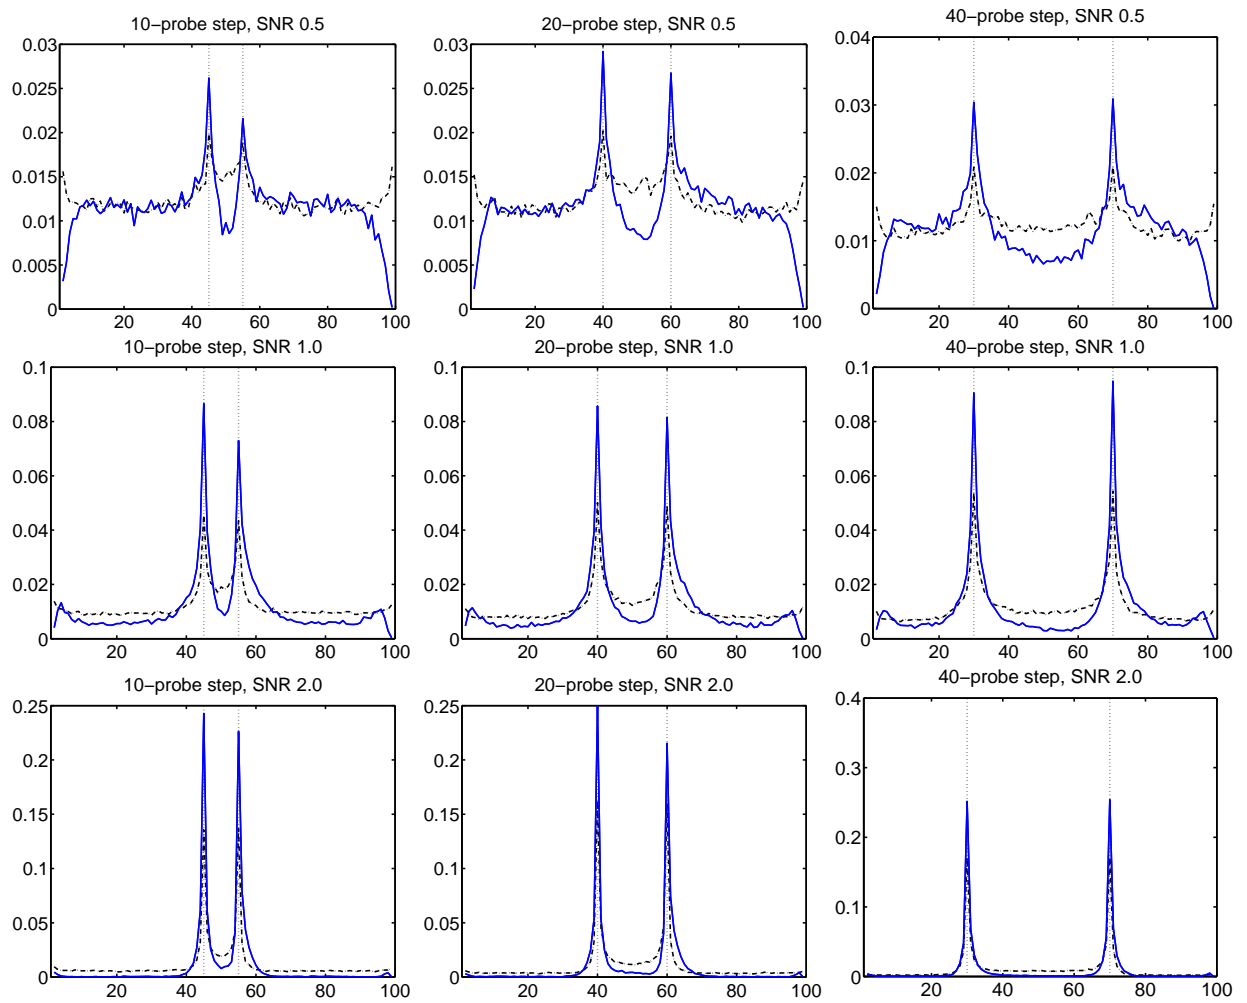

Breakpoint distribution,  $\pi = 0.1$

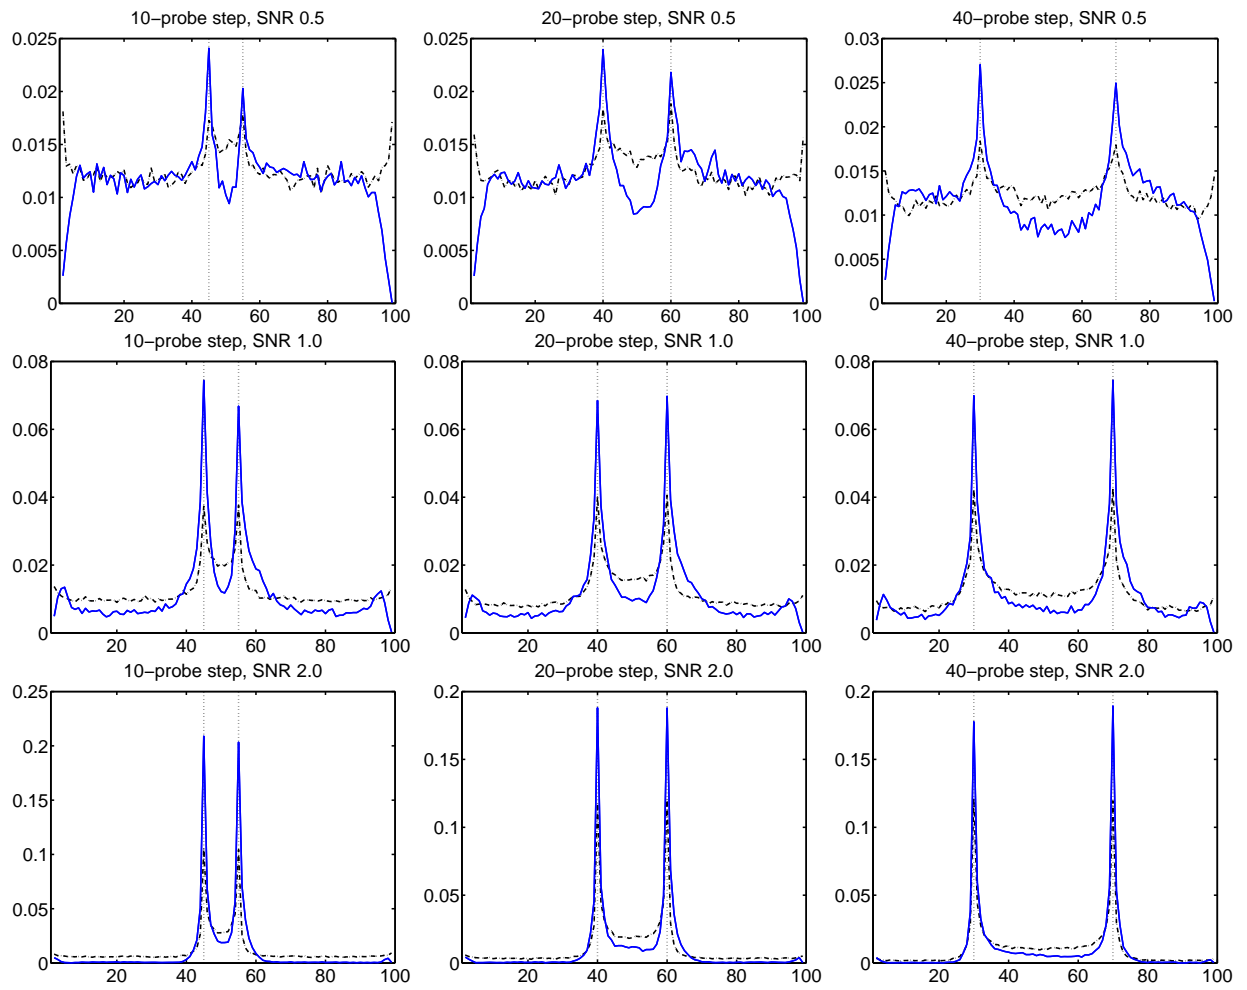

Breakpoint distribution,  $\pi = 0.2$

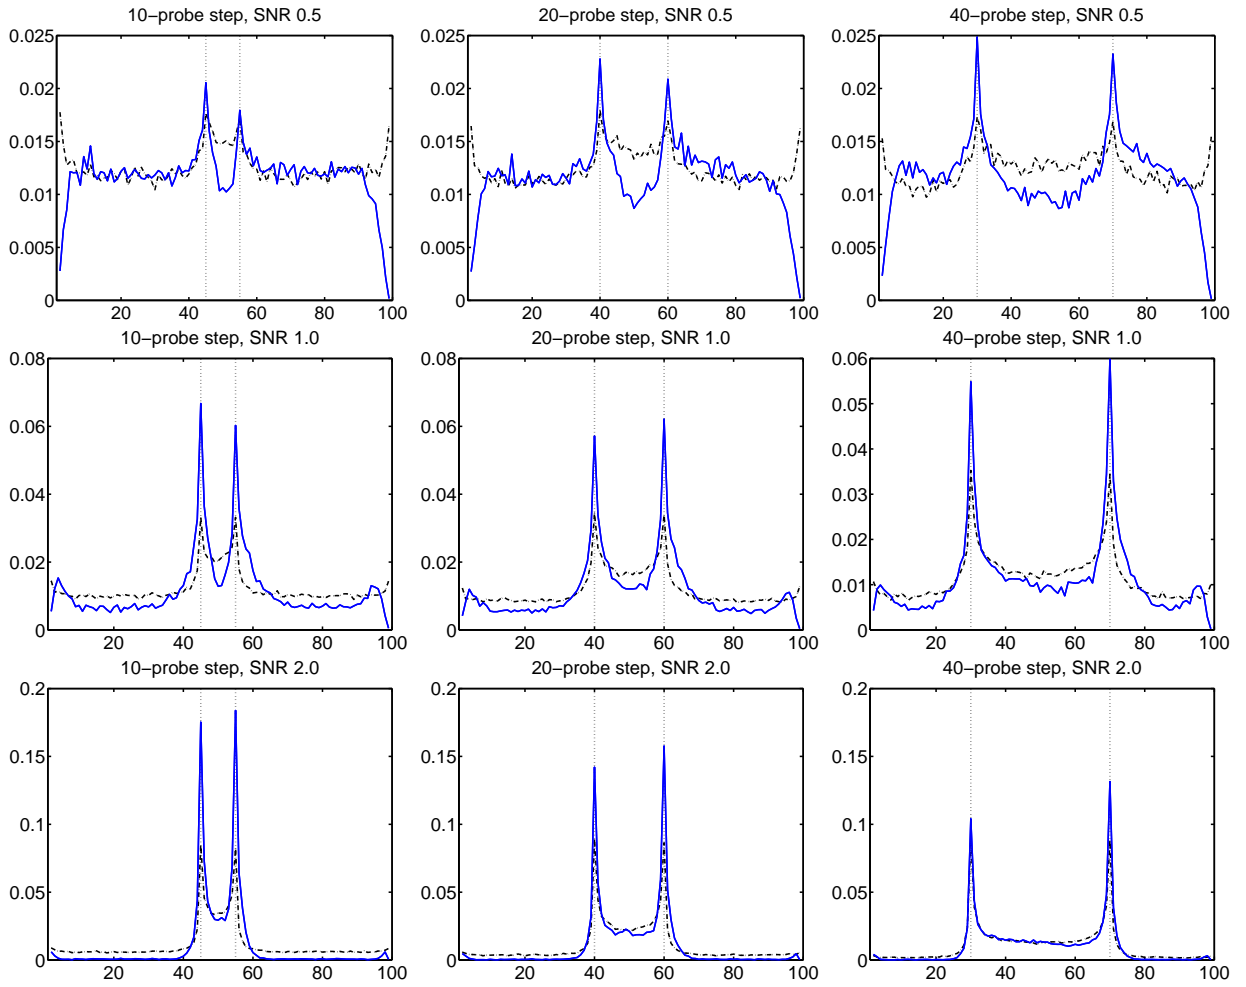

Breakpoint distribution,  $\pi = 0.3$

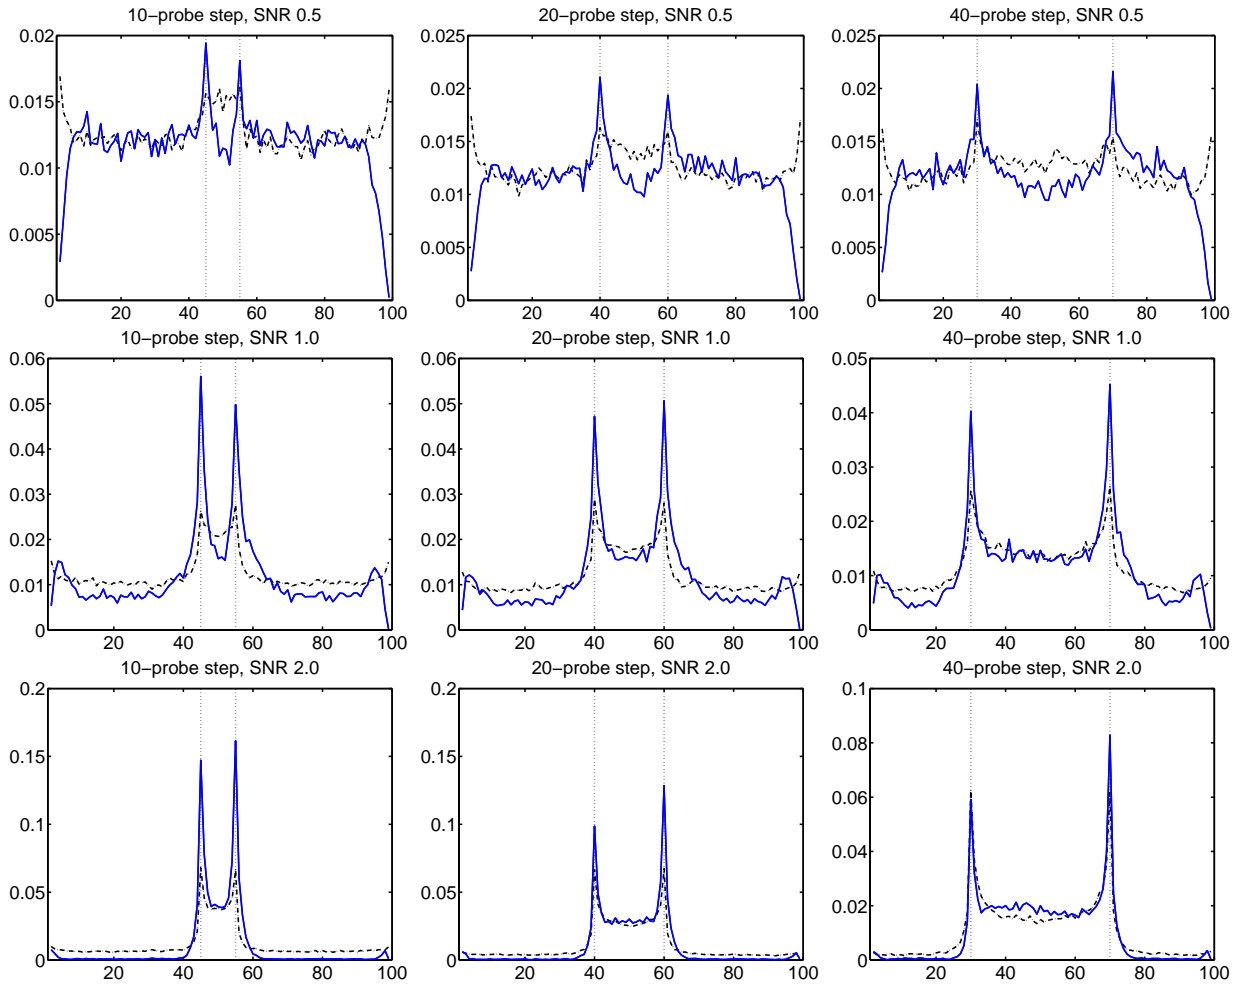

Breakpoint distribution,  $\pi = 0.4$

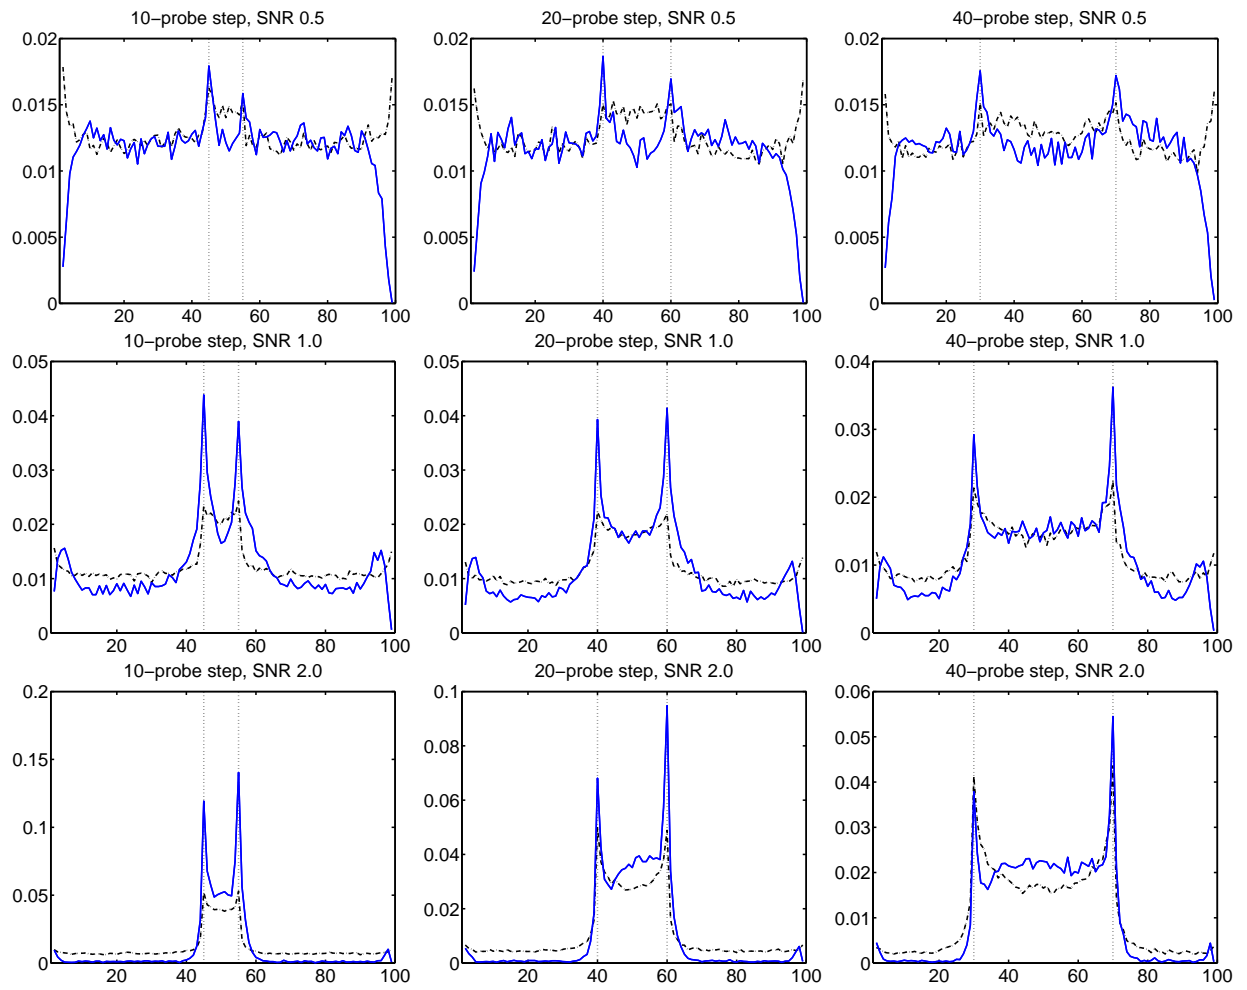

Breakpoint distribution,  $\pi = 0.5$
